# Supplementary material
Source: Springer Nature journal article supplement (https://www.springermedizin.de/resource/supplementary/12891_2006_340_MOESM2_ESM.pdf/9511094)

# Subacromial bursa

(All Physicians)

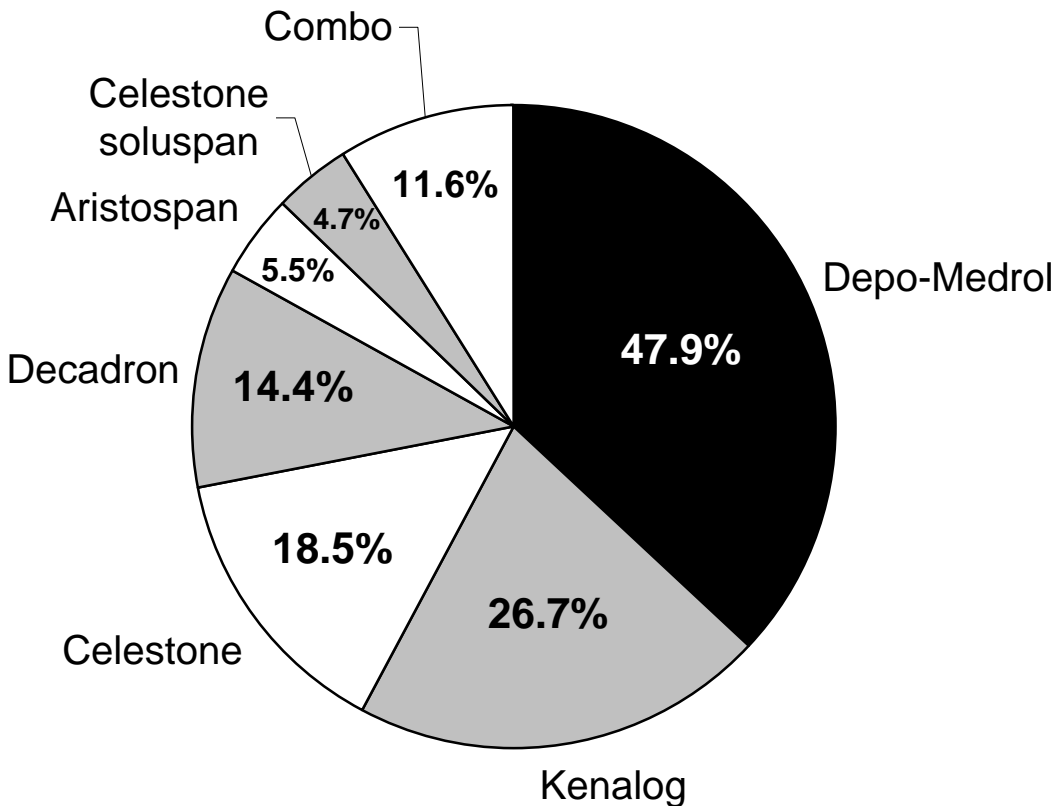

Supplement: MOESM2 [file 9511094]
